# Supplementary material for: Upscaling marine forest restoration: challenges, solutions and recommendations from the Green Gravel Action Group
Source: Frontiers journal article supplement (doi:10.3389/fmars.2024.1364263), 2024-04-09
Supplement: Data_Sheet_1.PDF [file Data_Sheet_1.PDF]

## Introduction

Dear GGAG,

We are inviting members of the Green Gravel Action Group team to take part in this study on local governance.

**Governance involves consideration of the institutions and actors involved in decision making, their roles and interrelationships, and the social frameworks which shape their deliberations (Kooiman 2003).**

This survey explores how local Governance relates to your kelp restoration program.

One member of each restoration team involved in the group will be asked to complete a brief background information checklist and a few questionnaires that identify the stage of their restoration project. The survey then covers questions about your program, local Governance in your region and whether local Governance structures hinder or facilitate your program's success. It also includes questions about changes to local Governance (e.g. in response to an existing barrier or gap).

If you manage kelp restoration programs in multiple countries or regions, please complete a separate survey for each region.

It should only take approximately 15-20 minutes to complete the questionnaires. At the conclusion, each member will be asked for their email so that they may be contacted again to complete a follow-up interview, to clarify any details that come out of the survey. Entering this section is entirely voluntary.

With your help, we aim to create a globally-relevant roadmap that identifies how, when and which local Governance factors should be considered in kelp restoration projects.

## Participant Consent

YES

NO

## General overview

Where is your restoration program based?

Country

State or region

Approximately how much kelp forest has been lost in your region?  
(Choose the most appropriate measure for your region)

ha

km<sup>2</sup>

linear km

Unknown (X)

Which stage of restoration best describes your project?

Initiation and stimulation stage 1: e.g. scoping/organising permits, funding and support necessary to conduct restoration, lab-based feasibility studies

Initiation and stimulation stage 2: ocean-based work at site-level scale

Scaling-up (eg applying proven restoration technique to multiple sites)

Sustenance and monitoring (initial planting completed, focus is on associated benefits or next generation of kelp)

Is this project:

(Check as many as apply)

Academic research

Government research

Commercial research

Commercial undertaking

Other

How long has your project been running?

Start year

End year

Ongoing?

What is/was the main aim of the project?

(Check as many as apply)

Testing the feasibility/effectiveness of restoration techniques

Restoration of complete/partially lost or declining forests

Management of uses of existing forests (harvesting, fisheries, etc)

Enhancement of resilience of existing/threatened forests

Other/commercial please explain:

What is/was the method of restoration used?

(Check as many as apply)

Seeding

Outplanting cultured kelp

Transplantation

Artificial reefs

Other

What influenced the choice of where to restore?

(Check as many as applicable)

Political will

Voluntary

Local Community demand

Academic interest

Convenience

Other

Please explain this choice briefly below:

What is/was the origin of seaweed used?

(Check as many as apply)

Wild harvested

Cultured

Based on the best available data, how would you describe the geographic origin of the seaweed used for restoration?

(Check as many as apply)

Local 1 - the same population as to what has been lost

Local 2 - not the same, but the most similar to what has been lost as possible

Non-local - distinct to what was lost

Unknown

What is the maximum distance between the geographic origin of the seaweed and restoration site?

(Choose the most appropriate measure for your region)

miles

km

What influenced the choice of the geographic origin of seaweed used?

(Check as many as apply)

Population size / health

Desirable genetics

Other desirable seaweed traits

Convenience

Official regulations or guidelines

Other

What is the average area you are/were actively working in? *i.e. you have the resources in place to conduct work at this scale*

(Choose the most appropriate measure for your region)

|                 |                      |
|-----------------|----------------------|
| ha              | <input type="text"/> |
| m <sup>2</sup>  | <input type="text"/> |
| km <sup>2</sup> | <input type="text"/> |
| linear km       | <input type="text"/> |

Approximately how much kelp forest do/did you actively intend to restore in your region? *i.e. area of restoration sites are spread across*  
(Choose the most appropriate measure for your region)

|                 |                      |
|-----------------|----------------------|
| ha              | <input type="text"/> |
| m <sup>2</sup>  | <input type="text"/> |
| km <sup>2</sup> | <input type="text"/> |
| linear km       | <input type="text"/> |

How many staff are/were involved in the project?

1-2 p

3-5 p

6-10 p

11-50 p

>50 p

How many volunteers are/were involved in the project ?

>50 p

Applicable

1 2 3 4 5 6 7 8 9 10

(1 = extremely low,  
10 = high)

☐

In your opinion, how would rate the **interest** of local authorities on the status of kelp forests in your study area?

Not  
Applicable

1 2 3 4 5 6 7 8 9 10

(1 = extremely low,  
10 = high)

☐

In your opinion, how you would rate the local authorities' **support/engagement** for **your project**:

(1 = extremely low, 10 = high)

Not  
Applicable

1 2 3 4 5 6 7 8 9 10

General interest,  
engagement and  
networking

☐

Funding

☐

Regulatory  
processes e.g.  
permitting

☐

Does your project include a community/regional outreach component?  
(workshops/ volunteers / surveys / media / etc)

No



Yes (Please describe briefly)

How long is/was the project funded for?

Overall (years):

How many successful rounds of funding has this included?

If multiple rounds exist, what is the average length of funding (months)

What is the total funding of the project?

Cash (local currency)   
\$

In-kind (local currency)   
\$

Currency: (e.g., USD)

An estimation of your project funding's origin by category (%) would be:

|                                                 | 0 | 10 | 20 | 30 | 40 | 50 | 60 | 70 | 80 | 90 | 100 | Not<br>Applicable        |
|-------------------------------------------------|---|----|----|----|----|----|----|----|----|----|-----|--------------------------|
| Government research grant                       |   |    |    |    |    |    |    |    |    |    |     | <input type="checkbox"/> |
| Academic Funding                                |   |    |    |    |    |    |    |    |    |    |     | <input type="checkbox"/> |
| Private business                                |   |    |    |    |    |    |    |    |    |    |     | <input type="checkbox"/> |
| Private philanthropy                            |   |    |    |    |    |    |    |    |    |    |     | <input type="checkbox"/> |
| NGO                                             |   |    |    |    |    |    |    |    |    |    |     | <input type="checkbox"/> |
| International Organisation (UN, UNEP, GEF, etc) |   |    |    |    |    |    |    |    |    |    |     | <input type="checkbox"/> |

Local Community grant

☐

Other

☐

Approximately how many person hours did it take to obtain/ensure the funding for your project (including failed funding attempts) ?

Do/did you have any partnerships with other entities to work on the project?

If the answer is 'No', move on to the next section

No

Yes

For each of the applicable project partner(s), describe how the relationship arose and how long you have been working together overall.

|                              | You reached out for this project | They reached out for this project | Existing partnership     | < 1 year                 | < 2 years                | < 5 years                | > 5 years                |
|------------------------------|----------------------------------|-----------------------------------|--------------------------|--------------------------|--------------------------|--------------------------|--------------------------|
| Government scientists        | <input type="checkbox"/>         | <input type="checkbox"/>          | <input type="checkbox"/> | <input type="checkbox"/> | <input type="checkbox"/> | <input type="checkbox"/> | <input type="checkbox"/> |
| Other Government departments | <input type="checkbox"/>         | <input type="checkbox"/>          | <input type="checkbox"/> | <input type="checkbox"/> | <input type="checkbox"/> | <input type="checkbox"/> | <input type="checkbox"/> |
| Local Authorities            | <input type="checkbox"/>         | <input type="checkbox"/>          | <input type="checkbox"/> | <input type="checkbox"/> | <input type="checkbox"/> | <input type="checkbox"/> | <input type="checkbox"/> |
| Local Community              | <input type="checkbox"/>         | <input type="checkbox"/>          | <input type="checkbox"/> | <input type="checkbox"/> | <input type="checkbox"/> | <input type="checkbox"/> | <input type="checkbox"/> |

|                            |                          |                          |                          |                          |                          |                          |                          |
|----------------------------|--------------------------|--------------------------|--------------------------|--------------------------|--------------------------|--------------------------|--------------------------|
| Indigenous Community       | <input type="checkbox"/> |
| Private Business           | <input type="checkbox"/> |
| NGO                        | <input type="checkbox"/> |
| International Organisation | <input type="checkbox"/> |
| Research Institutions      | <input type="checkbox"/> |
| Other                      | <input type="checkbox"/> |
| <input type="text"/>       |                          |                          |                          |                          |                          |                          |                          |

How would you describe, generally, the overall support, acknowledgment and/attitude of the different stakeholders on your project?

(1=actively opposing the project; 5= neither for nor against; 9=actively supporting the project)

|                                                                                                             | 1 | 2 | 3 | 4 | 5 | 6 | 7 | 8 | 9 | 10 | Not<br>Applicable        |
|-------------------------------------------------------------------------------------------------------------|---|---|---|---|---|---|---|---|---|----|--------------------------|
| Government                                                                                                  |   |   |   |   |   |   |   |   |   |    | <input type="checkbox"/> |
| Local Authorities                                                                                           |   |   |   |   |   |   |   |   |   |    | <input type="checkbox"/> |
| Local environmental groups                                                                                  |   |   |   |   |   |   |   |   |   |    | <input type="checkbox"/> |
| Private sector (direct interest in your study area, e.g fisheries, transport, tourism, etc)                 |   |   |   |   |   |   |   |   |   |    | <input type="checkbox"/> |
| Private Sector 2 (indirect interest in your study area, e.g offset by restoration, tourism, oil & gas, etc) |   |   |   |   |   |   |   |   |   |    | <input type="checkbox"/> |
| Local Communities                                                                                           |   |   |   |   |   |   |   |   |   |    | <input type="checkbox"/> |
| Academic Institution                                                                                        |   |   |   |   |   |   |   |   |   |    | <input type="checkbox"/> |

Other

Does/did your project require any form of permits/license or authorisation to be implemented?

If the answer is 'No', move on to the next section

No  
Yes

How many permits/licenses does/did your project require during this stage AND were the permits designed to aid scientific collection or experimentation only, or broader Restoration goals?

|     | National/ Federal        |                            | State/ Province          |                            | Region / Local           |                          |
|-----|--------------------------|----------------------------|--------------------------|----------------------------|--------------------------|--------------------------|
|     | Scientific experiments   | Restoration targeted/other | Scientific experiments   | Restoration targeted/other | Scientific experiments   | Restora targeted/        |
| 1   | <input type="checkbox"/> | <input type="checkbox"/>   | <input type="checkbox"/> | <input type="checkbox"/>   | <input type="checkbox"/> | <input type="checkbox"/> |
| 2   | <input type="checkbox"/> | <input type="checkbox"/>   | <input type="checkbox"/> | <input type="checkbox"/>   | <input type="checkbox"/> | <input type="checkbox"/> |
| 3   | <input type="checkbox"/> | <input type="checkbox"/>   | <input type="checkbox"/> | <input type="checkbox"/>   | <input type="checkbox"/> | <input type="checkbox"/> |
| 4   | <input type="checkbox"/> | <input type="checkbox"/>   | <input type="checkbox"/> | <input type="checkbox"/>   | <input type="checkbox"/> | <input type="checkbox"/> |
| 5   | <input type="checkbox"/> | <input type="checkbox"/>   | <input type="checkbox"/> | <input type="checkbox"/>   | <input type="checkbox"/> | <input type="checkbox"/> |
| > 5 | <input type="checkbox"/> | <input type="checkbox"/>   | <input type="checkbox"/> | <input type="checkbox"/>   | <input type="checkbox"/> | <input type="checkbox"/> |

Approximately how many person hours does/did it take to comply with the required regulations to undertake your work?

Include permit applications and time spent on Standard Operating Procedures, such as notifying authorities when work is being conducted.

Per year:

Overall for the project:

Are there any required permits you are/were not able to obtain? Please explain

Have you had to or would you need to change existing legislation or regulatory processes to conduct your work?

Please explain for each

Project initiation

Scaling up

Sustenance and monitoring

In the context of your project and with the objective to upscale it (e.g., deploy over larger area or maintain for longer time scale), how would you identify the following aspects:

|  | (check one)                     | In one short sentence, justify |
|--|---------------------------------|--------------------------------|
|  | Opportunity   Barrier   UNKNOWN | -                              |

|                                                                                                       |                       |                       |                       |                      |
|-------------------------------------------------------------------------------------------------------|-----------------------|-----------------------|-----------------------|----------------------|
| Permitting/Licensing process                                                                          | <input type="radio"/> | <input type="radio"/> | <input type="radio"/> | <input type="text"/> |
| Economics (financing, insurance, personnel, funding etc)                                              | <input type="radio"/> | <input type="radio"/> | <input type="radio"/> | <input type="text"/> |
| Local Politics (governance, policy, support, conflicts with other sectors, etc)                       | <input type="radio"/> | <input type="radio"/> | <input type="radio"/> | <input type="text"/> |
| Local Environmental Conditions (mitigation of threats or local working conditions etc)                | <input type="radio"/> | <input type="radio"/> | <input type="radio"/> | <input type="text"/> |
| Technical Expertise, Feasibility, Capacity (capacity, knowledge, technology, etc)                     | <input type="radio"/> | <input type="radio"/> | <input type="radio"/> | <input type="text"/> |
| Social Support (public perception, public acknowledgement, community support, conflicts, ethics, etc) | <input type="radio"/> | <input type="radio"/> | <input type="radio"/> | <input type="text"/> |

Any additional comments on Barriers/Opportunity/Gaps with regards to large-scale kelp restoration?

Any other relevant details on project that are important to mention?

## Block 4

OPTIONAL: Please supply your email address if you wish to be contacted about this survey directly

Powered by Qualtrics
