# Supplementary material for: Upscaling marine forest restoration: challenges, solutions and recommendations from the Green Gravel Action Group
Source: Frontiers journal article supplement (doi:10.3389/fmars.2024.1364263), 2024-04-09
Supplement: Data_Sheet_2.PDF [file Data_Sheet_2.PDF]

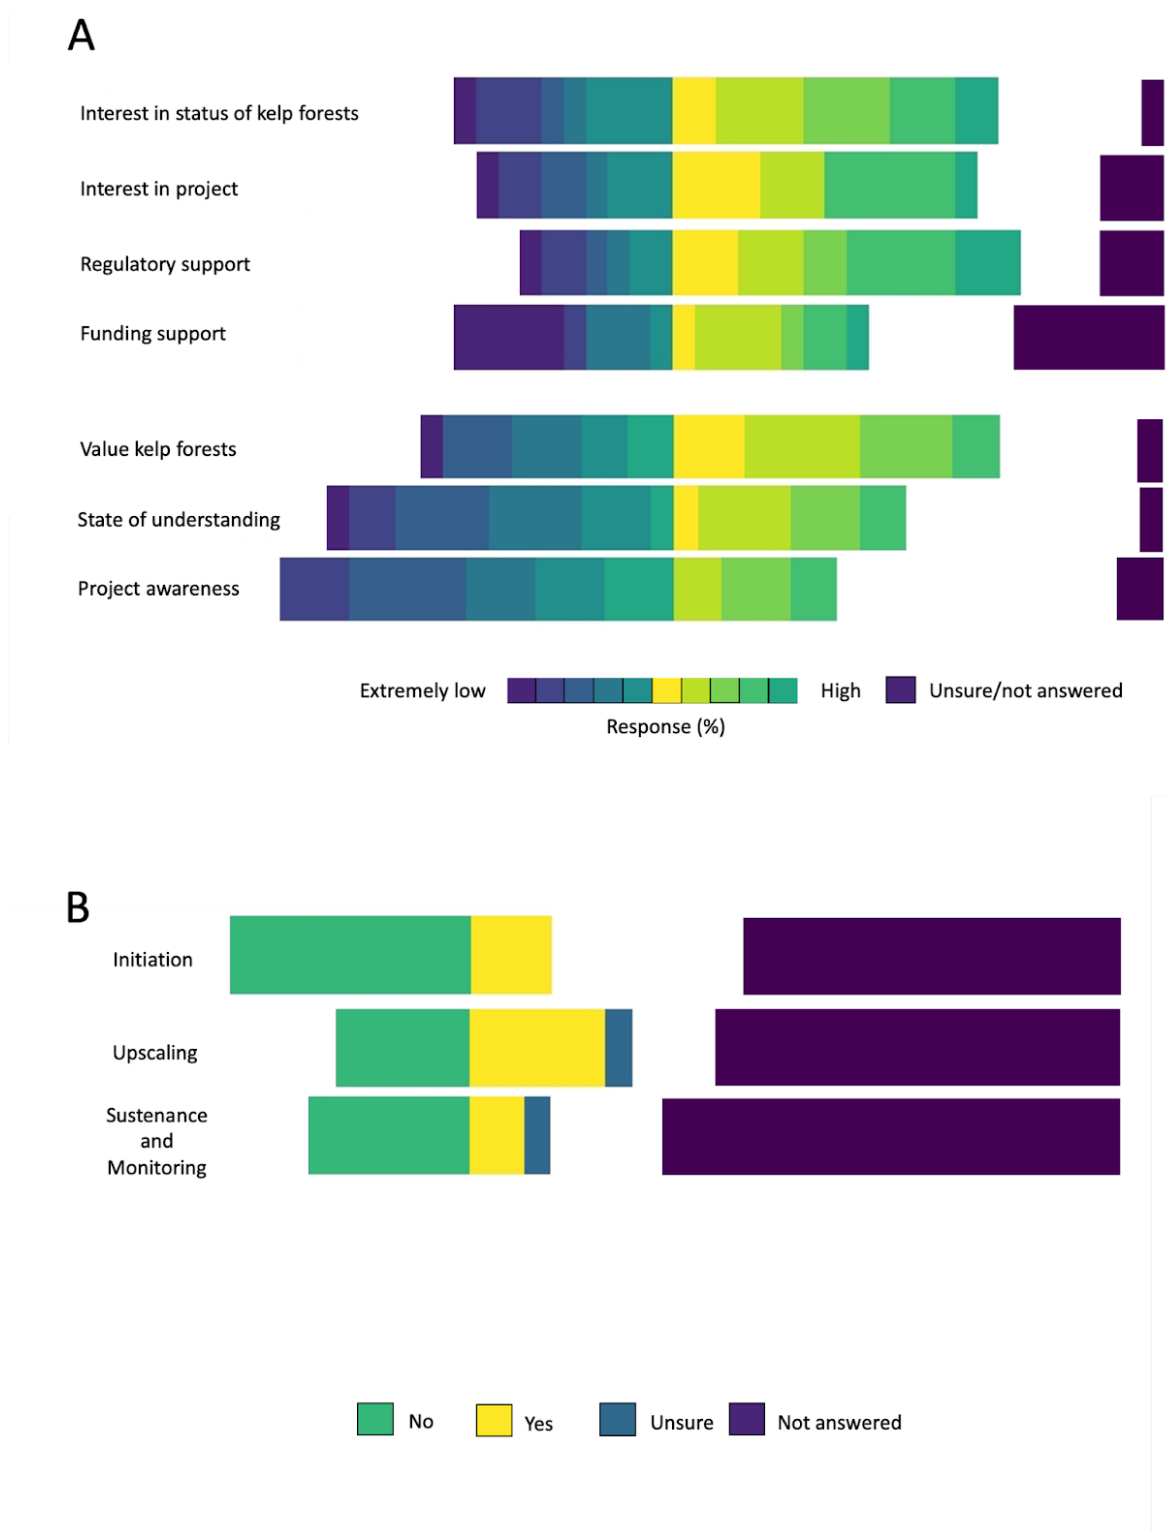

**Figure S1. Frequency histogram of participant responses to GGAG survey questions** (A) “In your opinion, how would you rate the (i) local community (top four bars) and (ii) local authorities’ (lower three bars) interest, support and engagement in the following aspects?” (categories listed on y axis); (B) Have you had to, or would you have to change existing legislation to carry out the following activities?:( categories listed on y axis). One survey was returned for each of the 25 macroalgal restoration projects.
